# Supplementary material for: Performance of CHROMagar ESBL media for the surveillance of extended-spectrum cephalosporin-resistant Enterobacterales (ESCrE) from rectal swabs in Botswana
Source: PubMed Central journal article supplement (PMC11145880; doi:10.1099/jmm.0.001770), 2023-11-22
Supplement: jmm-72-01770-s001.pdf [file jmm-72-01770-s001.pdf]

## SUPPLEMENTARY TABLES

**Table A1.** Summary of number of organisms isolated from CHROMagar™ ESBL that were susceptible to both ceftazidime and ceftriaxone when evaluated by automated susceptibility testing using the VITEK-2 system.

| MALDI-TOF-MS<br>species identification | Total No. (%)   | No. isolates with CHROMagar™ ESBL<br>colony color (%) |                  |
|----------------------------------------|-----------------|-------------------------------------------------------|------------------|
|                                        |                 | Metallic blue                                         | Dark pink/red    |
| <i>Citrobacter</i> spp.                | 61 (63.5)       | 49                                                    | 12               |
| <i>Klebsiella pneumoniae</i>           | 10 (10.4)       | 9                                                     | 1                |
| <i>Escherichia coli</i>                | 9 (9.4)         | 1                                                     | 8                |
| <i>Enterobacter cloacae</i>            | 4 (4.2)         | 3                                                     | 1                |
| <i>Kluyvera</i> spp.                   | 6 (6.3)         | 6                                                     | -                |
| GNB                                    | 3 (3.1)         | 3                                                     | -                |
| <i>Pseudomonas aeruginosa</i>          | 1 (1.0)         | 1                                                     | -                |
| <i>Acinetobacter baumannii</i>         | 1 (1.0)         | 1                                                     | -                |
| GPC                                    | 1 (1.0)         | 1                                                     | -                |
| <b>TOTAL</b>                           | <b>96 (100)</b> | <b>74 (77.1)</b>                                      | <b>22 (22.9)</b> |

Abbreviations: ESBL, extended-spectrum beta-lactamases; MALDI-TOF-MS, matrix-assisted laser desorption ionization-time of flight- mass spectrometry.

**Table A2.** Inconsistencies between CHROMagar ESBL colony morphology and VITEK-MALDI-TOF identification

|                     | <b>CHROMagar</b>          |                        |                              |            |
|---------------------|---------------------------|------------------------|------------------------------|------------|
| <b>Participants</b> | <b>Colony morphology</b>  | <b>Prospective ID.</b> | <b>VITEK-MALDI-TOF</b>       | <b>No.</b> |
| Participant-01      | Pink colonies             | <i>E. coli</i>         | <i>Escherichia coli</i>      |            |
|                     | Dark blue colonies        | KEC species            | <i>Escherichia coli</i>      | <b>1</b>   |
| Participant-02      | Pink colonies             | <i>E. coli</i>         | <i>Escherichia coli</i>      |            |
|                     | Dark blue colonies        | KEC species            | <i>Escherichia coli</i>      | <b>2</b>   |
| Participant-03      | Pink colonies             | <i>E. coli</i>         | <i>Escherichia coli</i>      |            |
|                     | Dark blue colonies        | KEC species            | <i>Escherichia coli</i>      | <b>3</b>   |
| Participant-04      | Pink colonies             | <i>E. coli</i>         | <i>Klebsiella pneumoniae</i> | <b>4</b>   |
|                     | Dark blue colonies        | KEC species            | <i>Klebsiella pneumoniae</i> |            |
| Participant-05      | Pink colonies             | <i>E. coli</i>         | <i>Escherichia coli</i>      |            |
|                     | Dark blue colonies        | KEC species            | <i>Escherichia coli</i>      | <b>5</b>   |
| Participant-06      | Pink colonies             | <i>E. coli</i>         | <i>Citrobacter freundii</i>  | <b>6</b>   |
|                     | Dark blue colonies        | KEC species            | <i>Citrobacter sedlakii</i>  |            |
| Participant-07      | Pink colonies             | <i>E. coli</i>         | <i>Citrobacter sedlakii</i>  | <b>7</b>   |
|                     | Dark blue colonies        | KEC species            | <i>Citrobacter sedlakii</i>  |            |
| Participant-08      | Pink colonies             | <i>E. coli</i>         | <i>Escherichia coli</i>      |            |
|                     | Dark blue colonies        | KEC species            | <i>Escherichia coli</i>      | <b>8</b>   |
| Participant-09      | Pink colonies             | <i>E. coli</i>         | <i>Citrobacter sedlakii</i>  | <b>9</b>   |
|                     | Dark blue colonies-type 1 | KEC species            | <i>Klebsiella pneumoniae</i> |            |
|                     | Dark blue colonies-type 2 | KEC species            | <i>Citrobacter sedlakii</i>  |            |
| Participant-10      | Pink colonies-type 1      | <i>E. coli</i> -01     | <i>Escherichia coli</i>      |            |
|                     | Pink colonies-type 2      | <i>E. coli</i> -02     | <i>Escherichia coli</i>      |            |
|                     | Dark blue colonies        | KEC species            | <i>Escherichia coli</i>      | <b>10</b>  |
| Participant-11      | Pink colonies             | <i>E. coli</i>         | <i>Klebsiella pneumoniae</i> | <b>11</b>  |
|                     | Dark blue colonies        | KEC species            | <i>Klebsiella pneumoniae</i> |            |
| Participant-12      | Pink colonies             | <i>E. coli</i>         | <i>Klebsiella pneumoniae</i> | <b>12</b>  |
|                     | Dark blue colonies        | KEC species            | <i>Klebsiella pneumoniae</i> |            |
| Participant-13      | Pink colonies             | <i>E. coli</i>         | <i>Escherichia coli</i>      |            |
|                     | Dark blue colonies        | KEC species            | <i>Escherichia coli</i>      | <b>13</b>  |
| Participant-14      | Pink colonies             | <i>E. coli</i>         | <i>Escherichia coli</i>      |            |
|                     | Dark blue colonies        | KEC species            | <i>Escherichia coli</i>      | <b>14</b>  |
| Participant-15      | Pink colonies             | <i>E. coli</i>         | <i>Escherichia coli</i>      |            |
|                     | Dark blue colonies        | KEC species            | Ox- GNR                      | <b>15</b>  |
| Participant-16      | Pink colonies             | <i>E. coli</i>         | <i>Escherichia coli</i>      |            |
|                     | Dark blue colonies        | KEC species            | <i>Escherichia coli</i>      | <b>16</b>  |
| Participant-17      | Pink colonies             | <i>E. coli</i>         | <i>Escherichia coli</i>      |            |
|                     | Dark blue colonies        | KEC species            | <i>Escherichia coli</i>      | <b>17</b>  |
| Participant-18      | Pink colonies             | <i>E. coli</i>         | <i>Enterobacter cloacae</i>  | <b>18</b>  |
|                     | Dark blue colonies        | KEC species            | <i>Enterobacter cloacae</i>  |            |
| Participant-19      | Pink colonies             | <i>E. coli</i>         | <i>Escherichia coli</i>      |            |
|                     | Dark blue colonies        | KEC species            | <i>Escherichia coli</i>      | <b>19</b>  |

|                |                    |                |                              |    |
|----------------|--------------------|----------------|------------------------------|----|
| Participant-20 | Pink colonies      | <i>E. coli</i> | <i>Escherichia coli</i>      |    |
|                | Green colonies     | KEC.green-01   | <i>Escherichia coli</i>      | 20 |
| Participant-21 | Pink colonies      | <i>E. coli</i> | <i>Escherichia coli</i>      |    |
|                | Dark blue colonies | KEC species    | <i>Escherichia coli</i>      | 21 |
| Participant-22 | Pink colonies      | <i>E. coli</i> | <i>Escherichia coli</i>      |    |
|                | Dark blue colonies | KEC species    | <i>Escherichia coli</i>      | 22 |
| Participant-23 | Pink colonies      | <i>E. coli</i> | <i>Escherichia coli</i>      |    |
|                | Dark blue colonies | KEC species    | <i>Escherichia coli</i>      | 23 |
| Participant-24 | Pink colonies      | <i>E. coli</i> | <i>Escherichia coli</i>      |    |
|                | Dark blue colonies | KEC species    | <i>Escherichia coli</i>      | 24 |
| Participant-25 | Pink colonies      | <i>E. coli</i> | <i>Escherichia coli</i>      |    |
|                | Dark blue colonies | KEC species    | <i>Escherichia coli</i>      | 25 |
| Participant-26 | Pink colonies      | <i>E. coli</i> | <i>Escherichia coli</i>      |    |
|                | Dark blue colonies | KEC species    | <i>Escherichia coli</i>      | 26 |
| Participant-27 | Pink colonies      | <i>E. coli</i> | <i>Escherichia coli</i>      |    |
|                | Dark blue colonies | KEC species    | <i>Escherichia coli</i>      | 27 |
| Participant-28 | Pink colonies      | <i>E. coli</i> | <i>Escherichia coli</i>      |    |
|                | Dark blue colonies | KEC species    | <i>Escherichia coli</i>      | 28 |
| Participant-29 | Pink colonies      | <i>E. coli</i> | <i>Enterobacter cloacae</i>  | 29 |
|                | Dark blue colonies | KEC species    | <i>Kluyvera cryocrescens</i> | 30 |
|                | GREEN colonies     | KEC.green-02   | <i>Enterobacter cloacae</i>  |    |
| Participant-30 | Pink colonies      | <i>E. coli</i> | <i>Escherichia coli</i>      |    |
|                | Dark blue colonies | KEC species    | <i>Kluyvera cryocrescens</i> | 31 |
| Participant-31 | Pink colonies      | <i>E. coli</i> | <i>Escherichia coli</i>      |    |
|                | GREEN colonies     | Kleb.green-01  | <i>Escherichia coli</i>      | 32 |
| Participant-32 | Pink colonies      | <i>E. coli</i> | <i>Citrobacter sedlakii</i>  | 33 |
|                | Dark blue colonies | KEC species    | <i>Citrobacter sedlakii</i>  |    |
| Participant-33 | Pink colonies      | <i>E. coli</i> | <i>Klebsiella pneumoniae</i> | 34 |
|                | Dark blue colonies | KEC species    | <i>Klebsiella pneumoniae</i> |    |
| Participant-34 | Pink colonies      | <i>E. coli</i> | <i>Escherichia coli</i>      |    |
|                | Dark blue colonies | KEC species    | <i>Escherichia coli</i>      | 35 |
| Participant-35 | Pink colonies      | <i>E. coli</i> | <i>Escherichia coli</i>      |    |
|                | Dark blue colonies | KEC species    | <i>Escherichia coli</i>      | 36 |
| Participant-36 | Pink colonies      | <i>E. coli</i> | <i>Escherichia coli</i>      | 37 |
|                | Dark blue colonies | KEC species    | <i>Escherichia coli</i>      |    |
| Participant-37 | Pink colonies      | <i>E. coli</i> | <i>Escherichia coli</i>      | 38 |
|                | Dark blue colonies | KEC species    | <i>Escherichia coli</i>      |    |
| Participant-38 | Pink colonies      | <i>E. coli</i> | <i>Escherichia coli</i>      |    |
|                | Dark blue colonies | KEC species    | <i>Escherichia coli</i>      | 39 |
| Participant-39 | Pink colonies      | <i>E. coli</i> | <i>Escherichia coli</i>      |    |
|                | Dark blue colonies | KEC species    | <i>Escherichia coli</i>      | 40 |
| Participant-40 | Pink colonies      | <i>E. coli</i> | <i>Escherichia coli</i>      |    |
|                | Dark blue colonies | KEC species    | <i>Proteus mirabilis</i>     | 41 |
| Participant-41 | Pink colonies      | <i>E. coli</i> | <i>Escherichia coli</i>      |    |
|                | Dark blue colonies | KEC species    | <i>Escherichia coli</i>      | 42 |

|                |                          |                |                                     |           |
|----------------|--------------------------|----------------|-------------------------------------|-----------|
| Participant-42 | Pink colonies            | <i>E. coli</i> | <i>Citrobacter sedlakii</i>         | <b>43</b> |
|                | Dark blue colonies       | KEC species    | <i>Citrobacter amalonaticus</i>     |           |
| Participant-43 | Dark blue colonies       | KEC species    | <i>Aeromonas caviae</i>             | <b>44</b> |
|                | Blue colonies            | KEC species    | <i>Citrobacter sedlakii/koseri</i>  |           |
| Participant-44 | Pink colonies            | <i>E. coli</i> | <i>Citrobacter werkmanii</i>        | <b>45</b> |
|                | Dark blue colonies       | KEC species    | <i>Citrobacter sedlakii</i>         |           |
| Participant-45 | Pink colonies            | <i>E. coli</i> | <i>Citrobacter sedlakii</i>         | <b>46</b> |
|                | Dark blue colonies       | KEC species    | <i>Klebsiella pneumoniae</i>        |           |
| Participant-46 | Pink colonies            | <i>E. coli</i> | <i>Escherichia coli</i>             |           |
|                | Dark blue colonies       | KEC species    | <i>Escherichia coli</i>             | <b>47</b> |
| Participant-47 | Dark blue colonies-large | KEC species    | <i>Escherichia coli</i>             | <b>48</b> |
|                | Dark blue colonies-small | KEC species    | Gram+ cocci                         | <b>49</b> |
| Participant-48 | Dark blue colonies-large | KEC species    | <i>Klebsiella pneumoniae</i>        |           |
|                | Dark blue colonies-small | KEC species    | Ox- GNR                             | <b>50</b> |
| Participant-49 | Pink colonies            | <i>E. coli</i> | <i>Escherichia coli</i>             |           |
|                | Dark blue colonies       | KEC species    | <i>Escherichia coli</i>             | <b>51</b> |
| Participant-50 | Pink colonies            | <i>E. coli</i> | <i>Escherichia coli</i>             |           |
|                | Dark blue colonies       | KEC species    | <i>Escherichia coli</i>             | <b>52</b> |
| Participant-51 | Pink colonies            | <i>E. coli</i> | <i>Proteus mirabilis</i>            | <b>53</b> |
|                | Dark blue colonies       | KEC species    | <i>Proteus mirabilis</i>            | <b>54</b> |
| Participant-52 | Pink colonies            | <i>E. coli</i> | <i>Enterobacter cloacae</i>         |           |
|                | Dark blue colonies       | KEC species    | <i>Enterobacter cloacae complex</i> | <b>55</b> |
| Participant-53 | Pink colonies            | <i>E. coli</i> | <i>Escherichia coli</i>             |           |
|                | Dark blue colonies       | KEC species    | <i>Escherichia coli</i>             | <b>56</b> |
| Participant-54 | Pink colonies            | <i>E. coli</i> | <i>Escherichia coli</i>             |           |
|                | Dark blue colonies       | KEC species    | <i>Escherichia coli</i>             | <b>57</b> |
| Participant-55 | Pink colonies            | <i>E. coli</i> | <i>Citrobacter braakii</i>          | <b>58</b> |
|                | Dark blue colonies       | KEC species    | <i>Citrobacter freundii</i>         |           |
|                | Green colonies           | KEC.green-02   | <i>Citrobacter braakii</i>          |           |
| Participant-56 | Pink colonies            | <i>E. coli</i> | <i>Escherichia coli</i>             |           |
|                | Dark blue colonies       | KEC species    | <i>Escherichia coli</i>             | <b>59</b> |



|    |                    |                   |                              |   |   |   |   |   |   |   |   |   |   |   |   |   |   |       |
|----|--------------------|-------------------|------------------------------|---|---|---|---|---|---|---|---|---|---|---|---|---|---|-------|
| 10 | Pink colonies- 1   | <i>E. coli</i> -1 | <i>Escherichia coli</i>      | R | S | S | R | S | S | S | S | S | S | I | I | R | R | Same  |
|    | Pink colonies- 2   | <i>E.coli</i> -2  | <i>Escherichia coli</i>      | R | S | S | R | S | S | S | S | S | S | I | I | R | R | Same  |
|    | Dark blue colonies | KEC spp.          | <i>Escherichia coli</i>      | R | S | I | R | R | S | S | S | S | S | S | I | S | R | Diff  |
| 11 | Pink colonies      | <i>E. coli</i>    | <i>Klebsiella pneumoniae</i> | R | S | I | R | I | S | S | S | I | S | S | S | R | R |       |
|    | Dark blue colonies | KEC spp.          | <i>Klebsiella pneumoniae</i> | R | S | I | R | I | S | S | S | R | S | S | S | R | R | Diff  |
| 12 | Pink colonies      | <i>E. coli</i>    | <i>Klebsiella pneumoniae</i> | R | R | R | S | S | S | S | S | S | S | S | I | S | S | Nit-R |
|    | Dark blue colonies | KEC spp.          | <i>Klebsiella pneumoniae</i> | R | S | I | R | S | S | S | S | S | S | S | I | S | S | Nit-S |
| 13 | Pink colonies      | <i>E. coli</i>    | <i>Escherichia coli</i>      | R | S | S | R | S | S | S | S | S | S | R | I | S | R |       |
|    | Dark blue colonies | KEC spp.          | <i>Escherichia coli</i>      | R | S | R | R | R | S | S | S | S | S | S | I | R | R | Diff  |
| 14 | Pink colonies      | <i>E. coli</i>    | <i>Escherichia coli</i>      | R | S | R | R | R | S | S | S | S | S | S | I | R | R | Nit-S |
|    | Dark blue colonies | KEC spp.          | <i>Escherichia coli</i>      | R | S | R | R | R | S | S | S | S | R | S | I | S | R | Nit-I |
| 15 | Pink colonies      | <i>E. coli</i>    | <i>Escherichia coli</i>      | R | R | R | R | S | I | S | S | S | S | S | I | R | R |       |
|    | Dark blue colonies | KEC spp.          | Ox+ GNR                      | R | S | S | S | S | S | S | S | S | S | S | S | S | S | Diff  |
| 16 | Pink colonies      | <i>E. coli</i>    | <i>Escherichia coli</i>      | R | S | S | R | S | S | S | S | S | S | S | I | R | S |       |
|    | Dark blue colonies | KEC spp.          | <i>Escherichia coli</i>      | R | S | I | R | I | S | S | S | R | S | S | S | R | R | Diff  |
| 17 | Pink colonies      | <i>E. coli</i>    | <i>Escherichia coli</i>      | R | S | I | R | I | S | S | S | S | S | S | S | R |   |       |
|    | Dark blue colonies | KEC spp.          | <i>Escherichia coli</i>      | R | S | I | R | S | S | S | S | S | S | S | S | R | R | Diff  |
| 18 | Pink colonies      | <i>E. coli</i>    | <i>Enterobacter cloacae</i>  | R | R | S | I | S | S | S | S | S | S | S | S | S |   |       |
|    | Dark blue colonies | KEC spp.          | <i>Enterobacter cloacae</i>  | R | R | S | I | S | S | S | S | S | S | S | S | S | S | Same  |
| 19 | Pink colonies      | <i>E. coli</i>    | <i>Escherichia coli</i>      | R | S | R | R | I | S | S | S | S | S | S | S | R | S |       |
|    | Dark blue colonies | KEC spp.          | <i>Escherichia coli</i>      | R | S | R | R | I | S | S | S | S | S | S | S | R | S | Same  |
| 20 | Pink colonies      | <i>E. coli</i>    | <i>Escherichia coli</i>      | R | S | R | R | R | S | S | S | S | S | I | I | R | R |       |
|    | Green colonies     | KEC. spp          | <i>Escherichia coli</i>      | R | S | R | R | R | S | S | S | S | S | S | I | R | R | Diff  |



|    |                    |                |                                                |   |   |   |    |   |    |   |   |   |    |   |   |   |   |       |
|----|--------------------|----------------|------------------------------------------------|---|---|---|----|---|----|---|---|---|----|---|---|---|---|-------|
|    | Dark blue colonies | KEC spp.       | <i>sedlakii</i><br><i>Citrobacter sedlakii</i> | R | R | S | S  | S | S  | S | S | S | S  | S | S | S | S | Nit-I |
| 33 | Pink colonies      | <i>E. coli</i> | <i>Klebsiella pneumoniae</i>                   | R | S | R | R  | I | S  | S | S | R | I  | R | R | S | R |       |
|    | Dark blue colonies | KEC spp.       | <i>Klebsiella pneumoniae</i>                   | R | S | R | R  | I | S  | S | S | R | I  | R | I | S | R | Diff  |
| 34 | Pink colonies      | <i>E. coli</i> | <i>Escherichia coli</i>                        | R | S | I | R  | S | S  | S | S | S | S  | S | S | R | R |       |
|    | Dark blue colonies | KEC spp.       | <i>Escherichia coli</i>                        | R | S | I | R  | S | S  | S | S | S | S  | S | S | R | R | Same  |
| 35 | Pink colonies      | <i>E. coli</i> | <i>Escherichia coli</i>                        | R | S | R | R  | R | S  | S | S | S | S  | S | I | R | R |       |
|    | Dark blue colonies | KEC spp.       | <i>Escherichia coli</i>                        | R | S | R | R  | R | S  | S | S | R | S  | I | I | I | R | Diff  |
| 36 | Pink colonies      | <i>E. coli</i> | <i>Escherichia coli</i>                        | R | S | I | R  | I | S  | S | S | S | S  | R | R | R | S |       |
|    | Dark blue colonies | KEC spp.       | <i>Escherichia coli</i>                        | R | S | R | R  | S | S  | S | S | S | S  | R | R | R | S | Diff  |
| 37 | Pink colonies      | <i>E. coli</i> | <i>Escherichia coli</i>                        | R | R | R | R  | I | S  | S | S | S | S  | R | I | R | S |       |
|    | Dark blue colonies | KEC spp.       | <i>Escherichia coli</i>                        | R | S | R | R  | I | S  | S | S | S | S  | R | I | R | R | Diff  |
| 38 | Pink colonies      | <i>E. coli</i> | <i>Escherichia coli</i>                        | R | S | S | R  | S | S  | S | S | S | S  | R | I | S | R |       |
|    | Dark blue colonies | KEC spp.       | <i>Escherichia coli</i>                        | R | S | I | R  | I | S  | S | S | S | S  | R | R | R | R | Diff  |
| 39 | Pink colonies      | <i>E. coli</i> | <i>Escherichia coli</i>                        | R | S | R | R  | I | S  | S | S | R | I  | R | I | S | R |       |
|    | Dark blue colonies | KEC spp.       | <i>Escherichia coli</i>                        | R | S | S | R  | I | S  | S | S | R | I  | R | I | S | R | Diff  |
| 40 | Pink colonies      | <i>E. coli</i> | <i>Escherichia coli</i>                        | R | S | R | R  | I | S  | S | S | S | S  | I | S | R | R |       |
|    | Dark blue colonies | KEC spp.       | <i>Proteus mirabilis</i>                       | R | S | R | R  | R | S  | S | S | S | S  | S | S | R | S | Diff  |
| 41 | Pink colonies      | <i>E. coli</i> | <i>Escherichia coli</i>                        | R | I | R | R  | R | S  | S | S | S | S  | S | S | R | R |       |
|    | Dark blue colonies | KEC spp.       | <i>Escherichia coli</i>                        | R | S | R | R  | R | S  | S | S | R | S  | R | R | R | R | Diff  |
| 42 | Pink colonies      | <i>E. coli</i> | <i>Citrobacter sedlakii</i>                    | R | R | S | S  | S | S  | S | S | S | S  | S | S | S | S |       |
|    | Dark blue colonies | KEC spp.       | <i>Citrobacter amalonaticus</i>                | R | S | S | S  | S | S  | S | S | S | S  | S | S | S | S | Diff  |
| 43 | Dark blue          | KEC spp.       | <i>Aeromonas</i>                               | I | S | R | NA | S | NA | S | S | S | NA | S | S | S | S |       |



|    |                          |                |                                     |    |    |    |    |    |    |    |    |    |    |    |    |    |      |       |
|----|--------------------------|----------------|-------------------------------------|----|----|----|----|----|----|----|----|----|----|----|----|----|------|-------|
|    | colonies                 |                | <i>caviae</i>                       |    |    |    |    |    |    |    |    |    |    |    |    |    |      |       |
|    | Blue colonies            | KEC spp.       | <i>Citrobacter sedlakii/koseri</i>  | R  | S  | S  | S  | S  | S  | S  | S  | S  | S  | S  | S  | S  | S    | Diff  |
|    |                          |                |                                     |    |    |    |    |    |    |    |    |    |    |    |    |    |      |       |
| 44 | Pink colonies            | <i>E. coli</i> | <i>Citrobacter werkmanii</i>        | R  | R  | I  | S  | S  | S  | S  | S  | S  | S  | S  | S  | S  | S    |       |
|    | Dark blue colonies       | KEC spp.       | <i>Citrobacter sedlakii</i>         | R  | R  | S  | S  | S  | S  | S  | S  | S  | S  | S  | S  | S  | S    | Diff  |
|    |                          |                |                                     |    |    |    |    |    |    |    |    |    |    |    |    |    |      |       |
| 45 | Pink colonies            | <i>E. coli</i> | <i>Citrobacter sedlakii</i>         | R  | I  | S  | S  | S  | S  | S  | S  | S  | S  | S  | S  | S  | S    |       |
|    | Dark blue colonies       | KEC spp.       | <i>Klebsiella pneumoniae</i>        | R  | S  | S  | R  | S  | S  | S  | S  | S  | S  | S  | R  | S  | Diff |       |
|    |                          |                |                                     |    |    |    |    |    |    |    |    |    |    |    |    |    |      |       |
| 46 | Pink colonies            | <i>E. coli</i> | <i>Escherichia coli</i>             | R  | I  | I  | S  | S  | S  | S  | S  | S  | S  | S  | R  | S  |      |       |
|    | Dark blue colonies       | KEC spp.       | <i>Escherichia coli</i>             | R  | S  | I  | R  | S  | S  | S  | S  | S  | S  | S  | R  | R  | Diff |       |
|    |                          |                |                                     |    |    |    |    |    |    |    |    |    |    |    |    |    |      |       |
| 47 | Dark blue colonies-large | KEC spp.       | <i>Escherichia coli</i>             | R  | S  | R  | R  | S  | S  | S  | S  | S  | S  | S  | R  | R  |      |       |
|    | Dark blue colonies-small | KEC spp.       | Gram+ cocci                         | NA | NA | NA | NA | NA | NA | NA | NA | NA | NA | NA | NA | NA | NA   |       |
|    |                          |                |                                     |    |    |    |    |    |    |    |    |    |    |    |    |    |      |       |
| 48 | Dark blue colonies-large | KEC spp.       | <i>Klebsiella pneumoniae</i>        | R  | S  | R  | R  | S  | S  | S  | S  | S  | S  | S  | R  | R  |      |       |
|    | Dark blue colonies-small | KEC spp.       | Ox- GNR                             | R  | S  | S  | S  | S  | S  | S  | S  | S  | S  | S  | S  | S  | Diff |       |
|    |                          |                |                                     |    |    |    |    |    |    |    |    |    |    |    |    |    |      |       |
| 49 | Pink colonies            | <i>E. coli</i> | <i>Escherichia coli</i>             | R  | S  | I  | R  | I  | S  | S  | S  | S  | S  | R  | R  | R  | S    | Nit-S |
|    | Dark blue colonies       | KEC spp.       | <i>Escherichia coli</i>             | R  | S  | I  | R  | I  | S  | S  | S  | S  | S  | R  | R  | R  | S    | Nit-I |
|    |                          |                |                                     |    |    |    |    |    |    |    |    |    |    |    |    |    |      |       |
| 50 | Pink colonies            | <i>E. coli</i> | <i>Escherichia coli</i>             | R  | S  | I  | R  | S  | S  | S  | S  | S  | S  | S  | R  | R  |      |       |
|    | Dark blue colonies       | KEC spp.       | <i>Escherichia coli</i>             | R  | S  | I  | R  | S  | S  | S  | S  | S  | S  | S  | R  | R  | Same |       |
|    |                          |                |                                     |    |    |    |    |    |    |    |    |    |    |    |    |    |      |       |
| 51 | Pink colonies            | <i>E. coli</i> | <i>Proteus mirabilis</i>            | R  | S  | R  | R  | I  | S  | S  | S  | S  | S  | I  | R  | R  |      |       |
|    | Dark blue colonies       | KEC spp.       | <i>Proteus mirabilis</i>            | R  | S  | R  | R  | I  | S  | S  | S  | S  | S  | I  | R  | R  | Same |       |
|    |                          |                |                                     |    |    |    |    |    |    |    |    |    |    |    |    |    |      |       |
| 52 | Pink colonies            | <i>E. coli</i> | <i>Enterobacter cloacae</i>         | R  | R  | R  | R  | I  | R  | S  | S  | S  | S  | S  | R  | R  |      |       |
|    | Dark blue colonies       | KEC spp.       | <i>Enterobacter cloacae complex</i> | R  | R  | R  | R  | I  | I  | S  | S  | S  | S  | S  | S  | S  | Diff |       |
|    |                          |                |                                     |    |    |    |    |    |    |    |    |    |    |    |    |    |      |       |
| 53 | Pink colonies            | <i>E. coli</i> | <i>Escherichia coli</i>             | R  | S  | I  | R  | I  | S  | S  | S  | S  | S  | S  | R  | R  |      |       |

|    |                    |                |                             |   |   |   |   |   |   |   |   |   |   |   |   |   |   |      |
|----|--------------------|----------------|-----------------------------|---|---|---|---|---|---|---|---|---|---|---|---|---|---|------|
|    | Dark blue colonies | KEC spp.       | <i>Escherichia coli</i>     | R | S | R | R | S | S | S | S | S | S | S | S | R | R | Diff |
| 54 | Pink colonies      | <i>E. coli</i> | <i>Escherichia coli</i>     | R | I | R | R | R | S | S | S | S | S | S | S | R | R |      |
|    | Dark blue colonies | KEC spp.       | <i>Escherichia coli</i>     | R | I | R | R | R | S | S | S | S | S | S | S | R | R | Same |
| 55 | Pink colonies      | <i>E. coli</i> | <i>Citrobacter braakii</i>  | R | R | S | S | S | S | S | S | S | S | S | S | R | S | Same |
|    | Dark blue colonies | KEC spp.1      | <i>Citrobacter freundii</i> | R | R | S | S | S | S | S | S | S | S | S | S | R | S | Same |
|    | Green colonies     | KEC spp.2      | <i>Citrobacter braakii</i>  | R | R | R | R | I | S | S | S | R | I | R | R | R | R | Diff |
| 56 | Pink colonies      | <i>E. coli</i> | <i>Escherichia coli</i>     | R | S | R | R | R | S | S | S | S | S | I | I | R | R |      |
|    | Dark blue colonies | KEC spp.       | <i>Escherichia coli</i>     | R | R | R | R | R | R | S | S | R | S | R | R | R | R | Diff |

KEY:ASP: Antibiotic susceptibility profile; Cefz- Cefazolin; Cefox- Cefoxitin; Ceftaz- Ceftazidime; Ceftri- Ceftriaxone; Cefepi- Cefepime; Erta- Ertapenem; Mero- Meropenem; Amika- Amikacin; Gent- Gentamicin; Tobr- Tobramycin; Cipro- Ciprofloxacin; Levo- Levofloxacin; Tetra- Tetracycline; Co-Tri- Trimethoprim/Sulfamethoxazole; Nit-Nitrofurantoin
